# Supplementary material
Source: ML conference proceedings conference paper supplement (https://openaccess.thecvf.com/content/ICCV2023/html/Lin_Leveraging_Intrinsic_Properties_ICCV_2023_paper.html)
Supplement: Supplementary file 2 [file Lin_Leveraging_Intrinsic_Properties_ICCV_2023_supplemental.zip]

Archive with 2 entries (2 files):
- 04349-suppdoc.pdf
- 04349-suppvideo.mp4
